# Supplementary material for: “Mitotic Slippage” and Extranuclear DNA in Cancer Chemoresistance: A Focus on Telomeres
Source: MDPI journal article supplement (doi:10.3390/ijms21082779), 2020-04-16
Supplement: s1 [file s1]

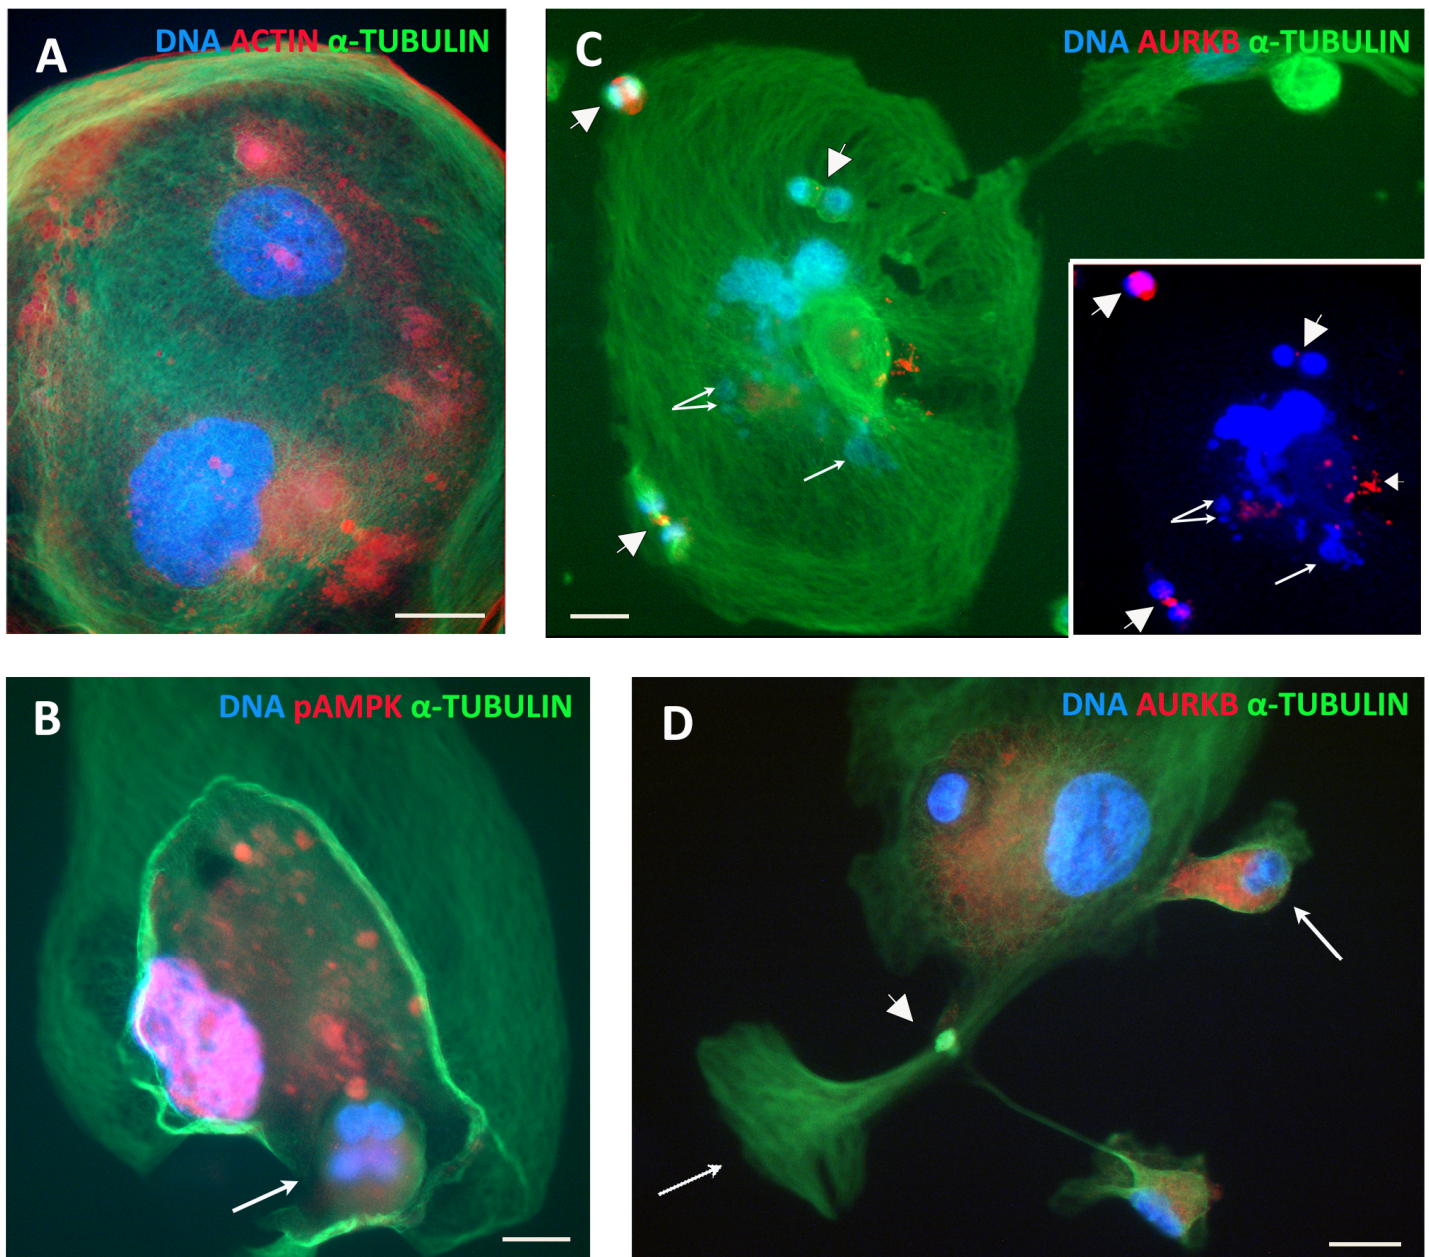

**Figure S1.** Amoeboid giant cells formed by DOX-treated MDA MB 231 cells grown on chamber slides on days 19-21 post-DOX-treatment. **(A)** The encysted cell, enriched with actin; **(B)** The excysting (?) tetranuclear subcell (arrow) is leaving a giant cell, while another subnucleus is positive for pAMPK inducing autophagy; **(C-D)** The features of the cooperativity between giant amoeboid cells and their progeny at late terms post- DOX-treatment. **(C)** A huge cell with the deteriorating nucleus (arrowed, better seen on insert) is homing at the same time three small cells performing mitosis (arrowheads): metaphase, anaphase, and telophase; **(D)** A giant amoeboid cell with a powerful “paddle” is budding a bi-nuclear subcell (arrow) and provides the mechanical support for the focal contact (arrowhead) of some other, small cell. Bars=25 μm.
